# Supplementary material for: New Insight into the Effects of Various Parameters on the Crystallization of Ribulose-1,5-Bisphosphate Carboxylase/Oxygenase (RuBisCO) from Alcaligenes eutrophus
Source: MDPI journal article supplement (doi:10.3390/cryst12020196), 2022-01-28
Supplement: s1 [file s1]

# New Insight into the Effects of Various Parameters on the Crystallization of Ribulose-1,5-Bisphosphate Carboxylase/Oxygenase (RuBisCO) from *Alcaligenes eutrophus*

Hui-Woog Choe <sup>1,\*</sup> and Yong Ju Kim <sup>2,3,4,\*</sup>

<sup>1</sup> Department of Chemistry, College of Natural Science, Jeonbuk National University, Baekje-daero 567, Jeonju 54896, Korea

<sup>2</sup> Department of Lifestyle Medicine, College of Environmental and Bioresource Sciences, Jeonbuk National University, Gobong-ro 79, Iksan 54596, Korea

<sup>3</sup> Department of Oriental Medicine Resources, College of Environmental and Bioresource Sciences, Jeonbuk National University, Gobong-ro 79, Iksan 54596, Korea

<sup>4</sup> Advanced Institute of Environment and Bioscience, College of Environmental & Bioresources Sciences, Jeonbuk National University, Gobong-ro 79, Iksan 54596, Korea

\* Correspondence: Correspondence: hwchoe@jbnu.ac.kr (H.-W.C.); nationface@jbnu.ac.kr (Y.J.K.)

## 1. Purification of RuBisCO from *Alcaligenes eutrophus*

Figure S1 represents the chromatogram of DEAE-sepharose Cl-6B anion exchange column. The left side vertical axis indicates the absorbance scale (optical density) at 280 nm. The right side vertical axis represents the concentration of KCl. The diagonal straight line indicates the gradient of KCl. One can read the KCl concentration of every peak eluted through DEAE-sepharose Cl-6B column which were bound to the column materials. The horizontal axis indicates the fraction numbers eluted from DEAE-sepharose Cl-6B column. To identify the RuBisCO, 50  $\mu$ l were taken out from the fractions responded to the indicated highest peaks (I, II, III, IV, and V) and determined the activity of RuBisCO as described in section 2.3 of the main manuscript. RuBisCO was eluted from the fraction number 62 to 71.

For checking the purity of RuBisCO, 10–20  $\mu$ l samples of each purification steps were collected and loaded on the SDS-PAGE. This result is represented in Figure S2. The detailed information was described in the legend of Figure S2.

**Citation:** Choe, H.-W.; Kim, Y.J. New Insight into the Effects of Various Parameters on the Crystallization of Ribulose-1,5-Bisphosphate Carboxylase/Oxygenase (RuBisCO) from *Alcaligenes eutrophus*. *Crystals* **2022**, *11*, 196. <https://doi.org/10.3390/cryst12020196>

Academic Editors: Borislav Angelov, Kyeong Kyu Kim and T. Doohun Kim

Received: 24 December 2021

Accepted: 25 January 2022

Published: 28 January 2022

**Publisher's Note:** MDPI stays neutral with regard to jurisdictional claims in published maps and institutional affiliations.

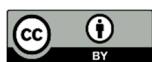

**Copyright:** © 2022 by the authors. Submitted for possible open access publication under the terms and conditions of the Creative Commons Attribution (CC BY) license (<https://creativecommons.org/licenses/by/4.0/>).

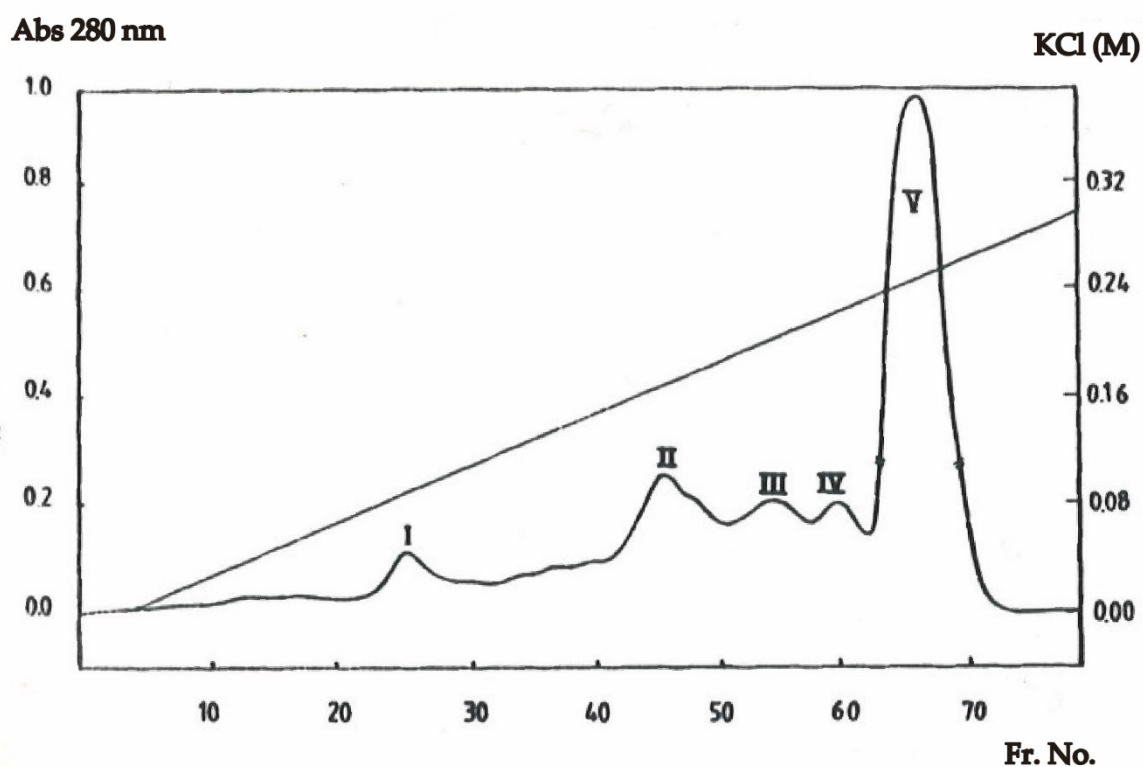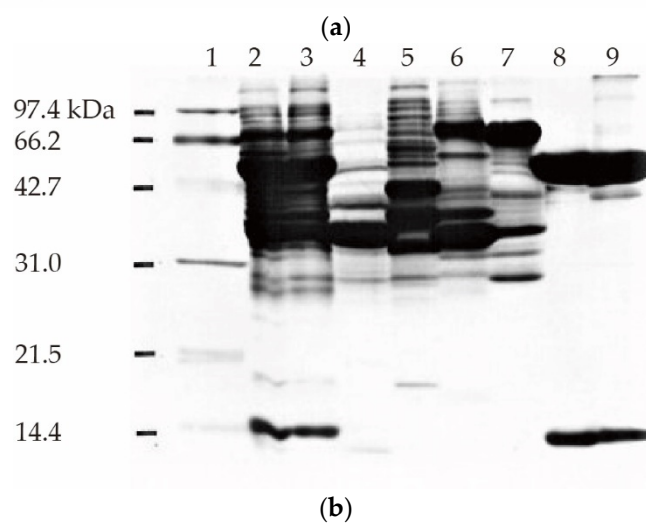

**Figure S1.** (a) Chromatogram of RuBisCO using by DEAE-Sepharose Cl-6B column. The diagonal line indicates the KCl concentration gradient. The peaks from I to V were loaded on the SDS-PAGE. Peak V indicates the RuBisCO fractions (Fraction number 62-71). (b) SDS-PAGE. Samples were taken out from the main fractions after the purification by DEAE- sepharose Cl-6B column. The lanes indicate as follows. (1) Marker, (2) Crude extract, (3) Ammonium sulfate fractionation (40%), (4) Peak I, (5) Peak II, (6) Peak III, (7) Peak IV, (8) Peak V, and (9) Side cuts of Peak V from the profile of the chromatogram shown as Figure S1a respectively.

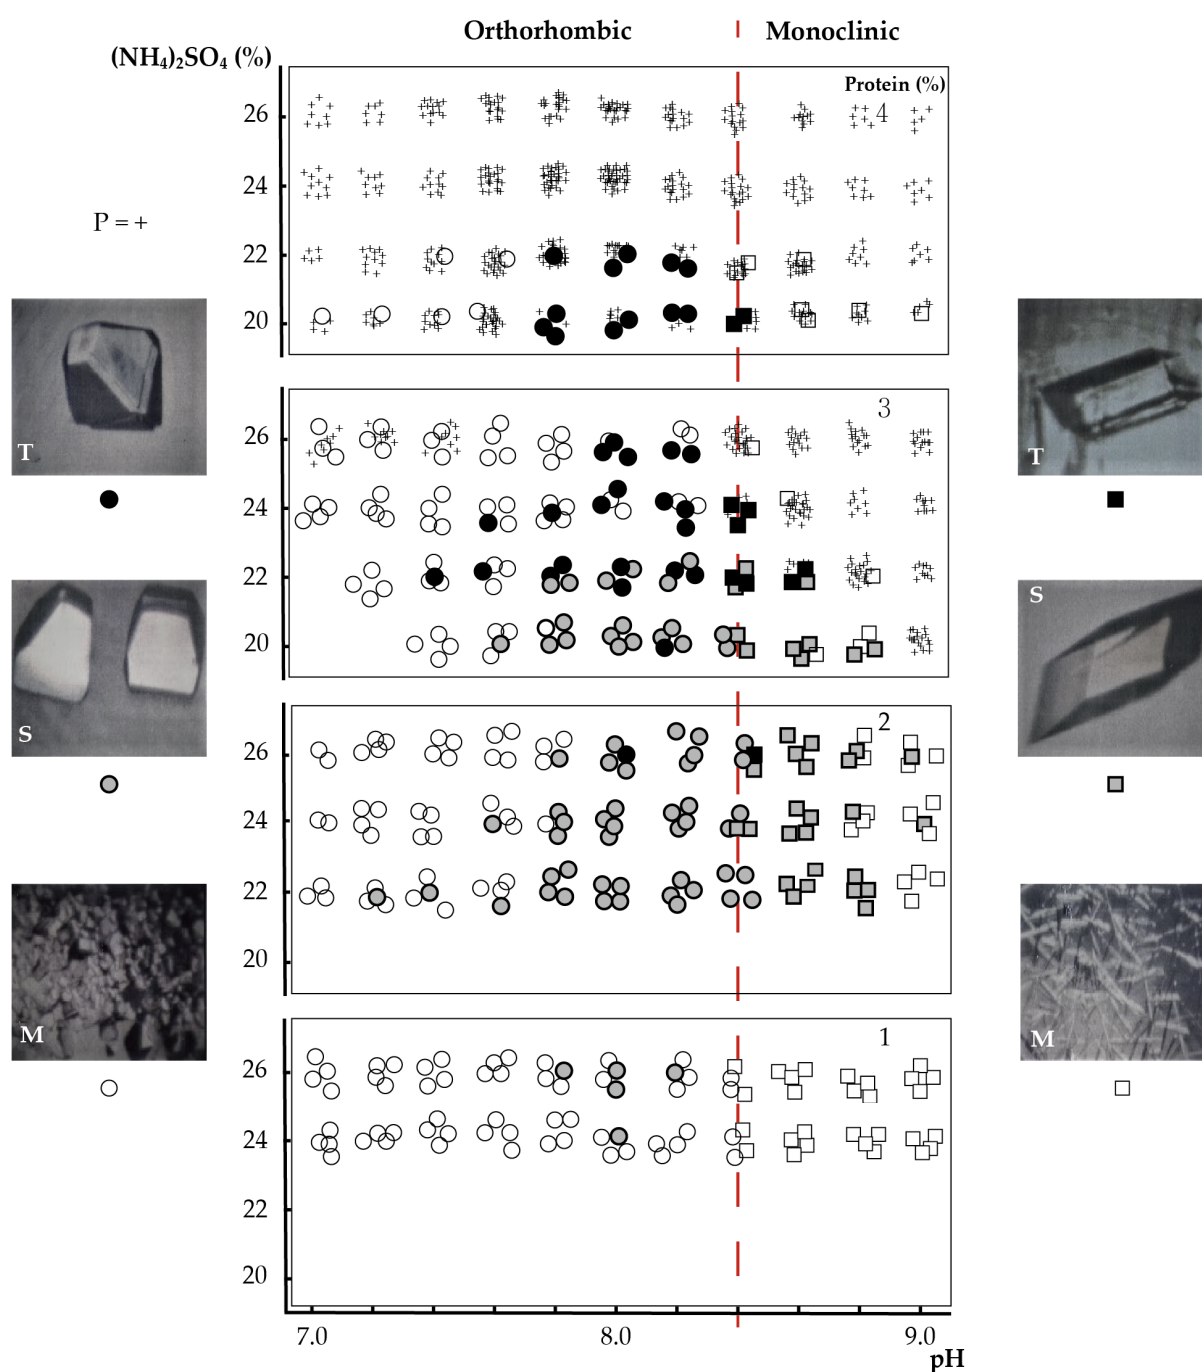

**Figure S2.** Influences of RuBisCO concentrations versus pH changes by the crystallization. The numbers of crystallization droplets which were observed orthorhombic twin crystals (T) are represented as ●, those of single crystals (S) marked as ◐, and those of microcrystals (M) represented as ○, while the numbers of crystallization droplets observed monoclinic twin crystals (T) are marked as ■, those of monoclinic single crystals (S) are shown as ◑, and those of microcrystals (M) are marked as □, at 20 °C. P represents + and stands for the area of precipitates. The concentrations of RuBisCO lower than 0.5% are blank in this diagram. Blank areas represent the unsaturated zones which could be observed neither crystals nor precipitates. The vertical red colored dotted line denotes the boundary of pH between the orthorhombic- or monoclinic morphology of RuBisCO crystals.

**Table S1.** Preliminary X-ray data of differently crystallized RuBisCOs from *A. eutrophus*.

| Paper                      | Protein preparation                                                                      | Crystallization                                           | Temp. Period     | Ligand                                                  | Diffraction                                                     | Resolution |
|----------------------------|------------------------------------------------------------------------------------------|-----------------------------------------------------------|------------------|---------------------------------------------------------|-----------------------------------------------------------------|------------|
| Bowien, B. <i>et al</i>    | 0.5% RuBisCO                                                                             | 20 mM Tris-HCl (pH 7.8)                                   | 4 °C weeks       | Ternary complex                                         | Space group                                                     | 3.5 Å      |
| Eur. J. Biochem.           | 20 mM Tris-HCl (pH 7.8)                                                                  | (NH <sub>4</sub> ) <sub>2</sub> SO <sub>4</sub>           |                  | Mg <sup>2+</sup> , HCO <sub>3</sub> <sup>-</sup>        | Tetragonal, P4 <sub>2</sub> 2 <sub>1</sub> 2                    |            |
| 106:405-410 (1980) [1]     | 10mM MgCl <sub>2</sub><br>50mM Na-HCO <sub>3</sub>                                       | MgSO <sub>4</sub><br>MPD<br>PEG 6000                      |                  |                                                         | Unit cell length<br>a=b= 112.7 Å, c= 201.4 Å<br>α=β=γ= 90 °     |            |
| Pal, G.P. <i>et al</i>     | 2% RuBisCO                                                                               | 20 mM Tris-HCl (pH 7.8)                                   | 20 °C weeks      | Quaternary complex                                      | Space group                                                     | 2.8 Å      |
| J.Biol.Chem.               | 20 mM Tris-HCl (pH 7.8)                                                                  | 1.5-2.0 M (NH <sub>4</sub> ) <sub>2</sub> SO <sub>4</sub> |                  | Mg <sup>2+</sup> , HCO <sub>3</sub> <sup>-</sup> , CABP | Orthorhombic, C222 <sub>1</sub>                                 |            |
| 260:10768-10770 (1985) [2] | 10mM MgCl <sub>2</sub><br>50mM Na-HCO <sub>3</sub>                                       | 10mM MgCl <sub>2</sub><br>50mM NaHCO <sub>3</sub>         |                  |                                                         | Unit cell length (Å)<br>a=b= 159.0 Å, c= 200.0 Å<br>α=β=γ= 90 ° |            |
| Hansen, S. <i>et al</i>    | 4% RuBisCO                                                                               | 20 mM HEPES (pH 7.5)                                      | 4 °C weeks       | Apo-enzyme                                              | Space group                                                     | 2.7 Å      |
| Acta Cryst. D.             | Isoform I                                                                                | 0.7-0.8 M K <sub>2</sub> HPO <sub>4</sub> (pH 9.2)        |                  |                                                         | Tetragonal, P4 <sub>3</sub> 2 <sub>1</sub> 2                    |            |
| 55:310-313 (1999) [3]      | 50 mM Tris-HCl (pH 7.8)<br>(NH <sub>4</sub> ) <sub>2</sub> SO <sub>4</sub> precipitation |                                                           |                  |                                                         | Unit cell parameter<br>a=b= 112.0 Å, c= 402.7 Å<br>α=β=γ= 90 °  |            |
| Hansen, S. <i>et al</i>    | 4% RuBisCO                                                                               | 20 mM HEPES (7.5)                                         | 4 °C weeks       | Apo-enzyme                                              | Space group                                                     | 3.2 Å      |
| Acta Cryst. D.             | Isoform II                                                                               | 8.5% PEG 4000                                             |                  |                                                         | Tetragonal, P4 <sub>3</sub> 2 <sub>1</sub> 2                    |            |
| 55:310-313 (1999) [3]      | 50 mM Tris-HCl (pH 7.8)<br>(NH <sub>4</sub> ) <sub>2</sub> SO <sub>4</sub> precipitation | 1 M NaCl                                                  |                  |                                                         | Unit cell parameter<br>a=b= 111.8 Å, c= 400.0 Å<br>α=β=γ= 90 °  |            |
| Current study              | 4% RuBisCO<br>20 mM                                                                      | 20 mM Tris-HCl (PH 8.5)<br>100 mM NaOAc                   | 4 °C weeks<br>20 | Quaternary complex<br>Mg <sup>2+</sup> ,                | Space group<br>Monoclinic, P2 <sub>1</sub>                      | 2.2 Å      |

|        |                          |                                                                  |    |                                       |                                    |
|--------|--------------------------|------------------------------------------------------------------|----|---------------------------------------|------------------------------------|
|        | Tris-HCl (pH 7.8)        | (PH 8.5)                                                         | °C | HCO <sub>3</sub> <sup>-</sup> , CAB P |                                    |
| (2022) | 10mM MgCl <sub>2</sub>   | 22-28% saturated (NH <sub>4</sub> ) <sub>2</sub> SO <sub>4</sub> |    |                                       | Unit cell parameter                |
|        | 50mM Na-HCO <sub>3</sub> |                                                                  |    |                                       | a= 158.6 Å, b= 160.2 Å, c= 202.7 Å |
|        |                          |                                                                  |    |                                       | α=γ= 90 °, β= 91.8 °               |

**Table S2.** X-ray 3D structures of RuBisCOs from *A. eutrophus*.

| Paper                                 | Protein preparation                                                                                   | Method                                                                      | Temp. Period | Ligand                                                   | Diffraction                                                             | Res. ol. |
|---------------------------------------|-------------------------------------------------------------------------------------------------------|-----------------------------------------------------------------------------|--------------|----------------------------------------------------------|-------------------------------------------------------------------------|----------|
| Holzenburg, A.                        | 0.15 M Tris-HCl (pH 7.8)                                                                              | Electron                                                                    |              | Quaternary complex                                       |                                                                         | 5 Å      |
| <i>et al</i>                          | 10mM MgCl <sub>2</sub>                                                                                | microscopy                                                                  |              | Mg <sup>2+</sup> , HCO <sub>3</sub> <sup>-</sup> , CAB P |                                                                         |          |
| Nature 325: 730–732 (1987) [4]        | 50mM Na-HCO <sub>3</sub>                                                                              |                                                                             |              |                                                          |                                                                         |          |
| Hansen, S. <i>et al</i>               | 4% RuBisCO                                                                                            | 20 mM HEPES (pH 7.5)                                                        | 4 °C weeks   | Apo-structure                                            | Space group                                                             | 2.7 Å    |
| J. Mol. Biol. 288: 609–621 (1999) [5] | Isoform I<br>50 mM Tris-HCl (pH 7.8)<br>(NH <sub>4</sub> ) <sub>2</sub> SO <sub>4</sub> precipitation | 0.7–0.8 M K <sub>2</sub> HPO <sub>4</sub> (pH 9.2)<br>X-ray crystallography |              | (PDB entry: 1BXN)<br><br>inactive                        | Tetragonal, P4 <sub>3</sub> 2 <sub>1</sub> 2<br><br>Unit cell parameter |          |
|                                       |                                                                                                       |                                                                             |              |                                                          | a=b= 112.0 Å, c= 402.7 Å<br>α=β=γ= 90 °                                 |          |

## Reference

1. BOWIEN, B.; MAYER, F.; SPIESS, E.; PÄHLER, A.; ENGLISCH, U.; SAENGER, W. On the structure of crystalline ribulosebiphosphate carboxylase from *Alcaligenes eutrophus*. *Eur. J. Biochem.* **1980**, *106*, 405–410.
2. Pal, G.P.; Jakob, R.; Hahn, U.; Bowien, B.; Saenger, W. Single and twinned crystals of ribulose-1, 5-bisphosphate carboxylase-oxygenase from *Alcaligenes eutrophus*. *J. Biol. Chem.* **1985**, *260*, 10768–10770.
3. Hansen, S.; Hough, E.; Andersen, K. Purification, crystallization and preliminary X-ray studies of two isoforms of Rubisco from *Alcaligenes eutrophus*. *Acta Crystallogr. Sect. D: Biol. Crystallogr.* **1999**, *55*, 310–313.
4. Holzenburg, A.; Mayer, F.; Harauz, G.; Van Heel, M.; Tokuoka, R.; Ishida, T.; Harata, K.; Pal, G.; Saenger, W. Structure of D-ribulose-1, 5-bisphosphate carboxylase/oxygenase from *Alcaligenes eutrophus* H16. *Nat.* **1987**, *325*, 730–732.
5. Hansen, S.; Vollen, V.B.; Hough, E.; Andersen, K. The crystal structure of Rubisco from *Alcaligenes eutrophus* reveals a novel central eight-stranded β-barrel formed by β-strands from four subunits. *J. Mol. Biol.* **1999**, *288*, 609–621.
